# Supplementary material for: A multistimuli responsive and self-healing Zn(ii)–inosine supramolecular metal–organic gel: phase selective gelation and application as a light-responsive Schottky barrier diode
Source: Royal Society of Chemistry journal article supplement (doi:10.1039/d4na01079e), 2025-01-01
Supplement: d4na01079e1.pdf [file d4na01079e1.pdf]

## Supplementary Information

### **A multistimuli responsive and self-healing zn (ii)-inosine supramolecular metal-organic gel: phase selective gelation and application as a light-responsive schottky barrier diode**

Surbhi Singh,<sup>a</sup> Atul Kumar Sharma,<sup>b</sup> Kunal Rohilla,<sup>a</sup> Nisha Verma,<sup>a</sup> and Bhagwati Sharma\*<sup>a</sup>

*<sup>a</sup>Materials Research Centre, Malaviya National Institute of Technology Jaipur, Malviya Nagar, Jaipur 302017, India.*

*Email: [bhagwati.mrc@mnit.ac.in](mailto:bhagwati.mrc@mnit.ac.in)*

*<sup>b</sup>Department of Electronics and Communication Engineering, Malaviya National Institute of Technology Jaipur, Malviya Nagar, Jaipur 302017, India.*

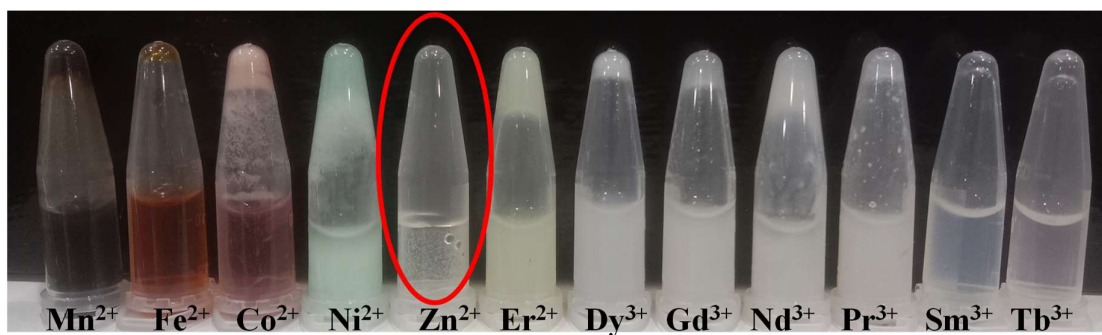

**Figure S1.** Digital images showing the specificity of  $\text{Zn}^{2+}$  ions towards the formation of hydrogel upon interaction with inosine.

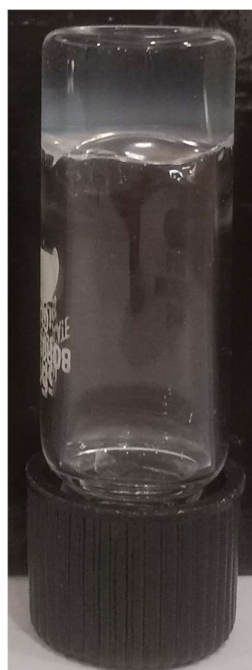

**Figure S2.** Digital image of Zn-I metallogel after 6 months, showing the stability of the gel.

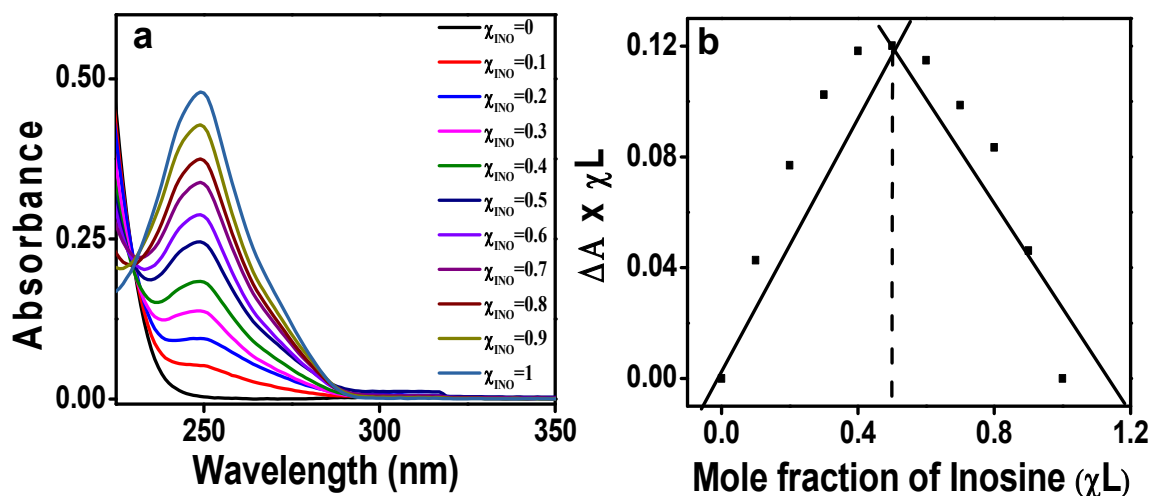

**Figure S3.** (a) Changes in the UV-visible spectra of Zn(CH<sub>3</sub>COO)<sub>2</sub> (5 × 10<sup>-5</sup> M) upon addition of different mole fractions of inosine (5 × 10<sup>-5</sup> M) (b) Job's plot obtained by following the absorbance at 250 nm, indicating a 1:1 metal-ligand stoichiometry.

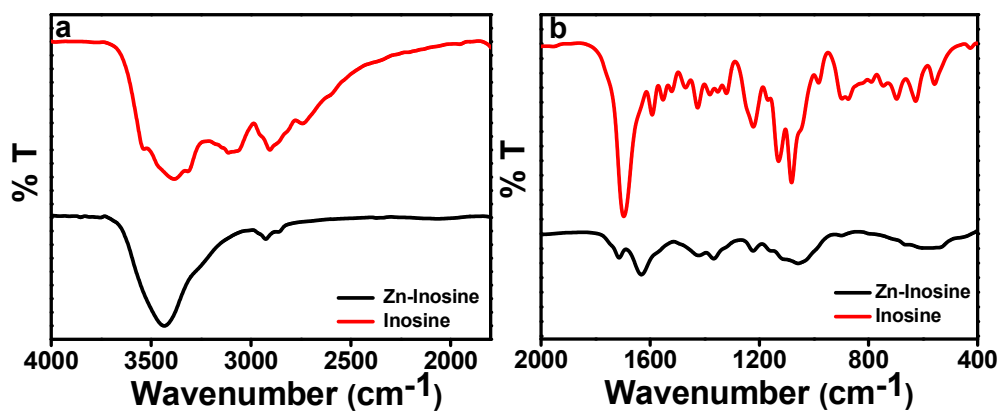

**Figure S4.** FTIR spectrum of inosine and Zn-inosine xerogel in the region (a) 4000-2000 cm<sup>-1</sup> and (b) 2000-400 cm<sup>-1</sup>.

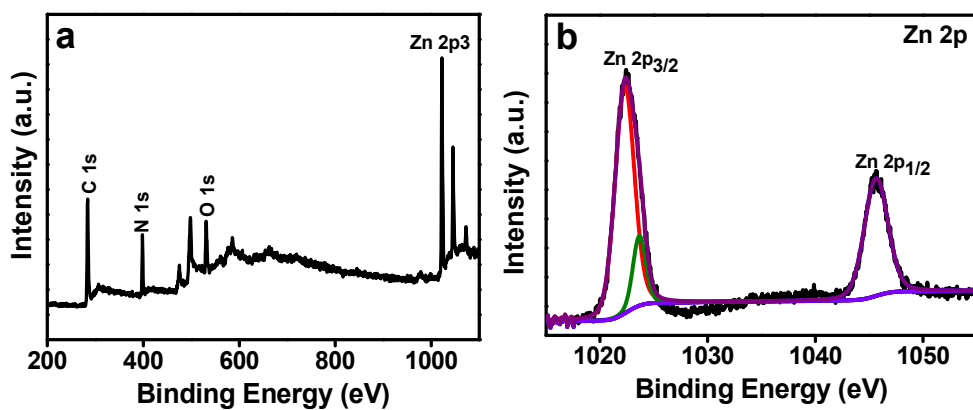

Figure S5. XPS spectra of Zn-inosine metallogel: (a) Survey spectrum and (b) Zn2p spectrum

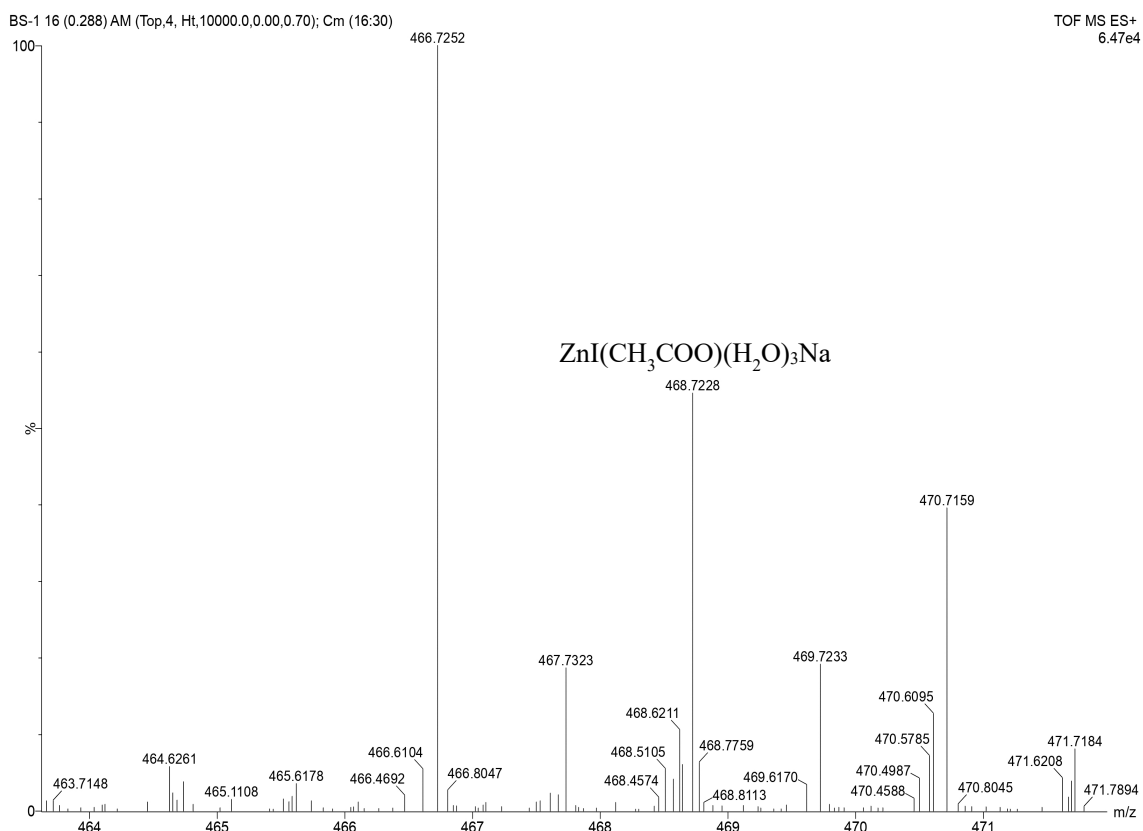

Figure S6. ESI- MS spectrum of a 1:1 mixture of inosine and zn-acetate (both 20 mM).

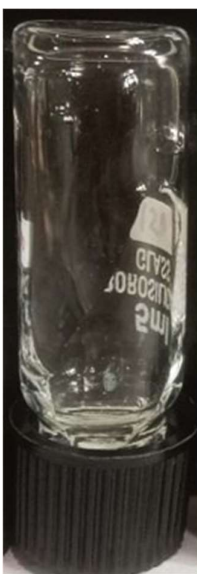

**Figure S7.** Digital image showing the formation of viscous sol at 20 mM concentration of both the precursors.

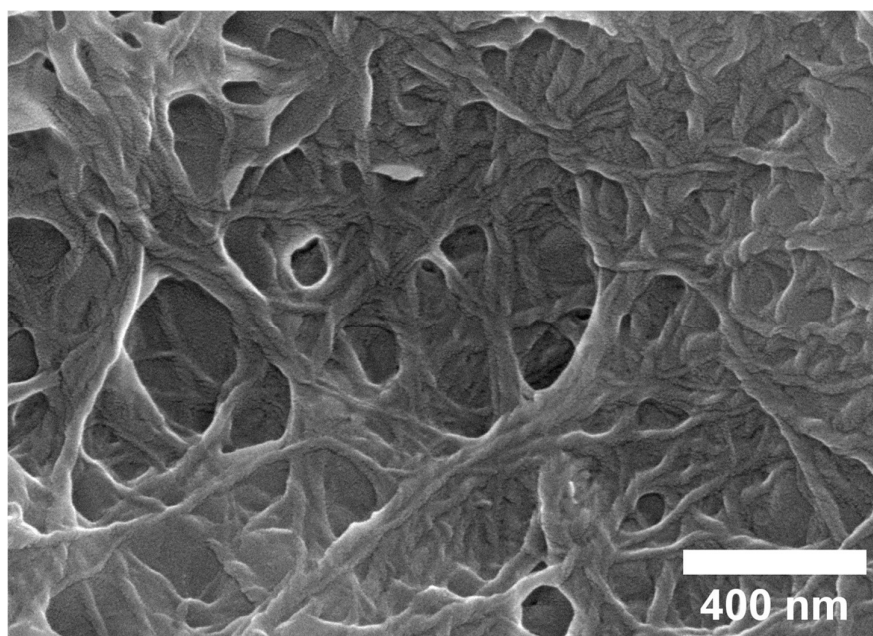

**Figure S8.** FESEM image of the viscous sol at a concentration of 20 mM for both the precursors showing nanofibrous morphology.

**Table S1.** Interaction of Inosine with  $Zn^{2+}$  ions with varying molar ratios (With a variation in the molar concentration of both the reactants).

| Inosine (M) | Zinc Acetate (M) | Result     |
|-------------|------------------|------------|
| 0.05        | 0.1              | Weak Gel   |
| 0.075       | 0.1              | Gel        |
| 0.1         | 0.1              | Strong Gel |
| 0.1         | 0.075            | Gel        |
| 0.1         | 0.05             | Weak Gel   |

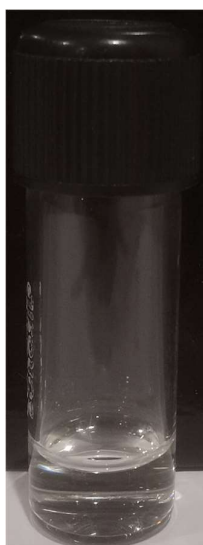

**Figure S9.** (a) Digital image of a 1:1 mixture of Inosine (dissolved in 1M HCl) and Zn-acetate, showing the formation of a clear solution.

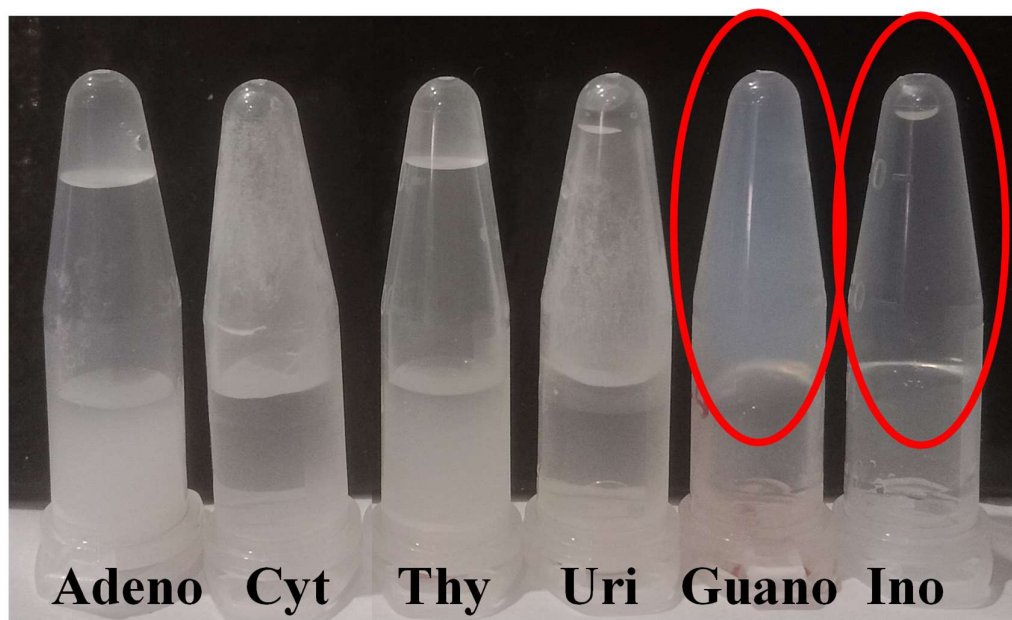

**Figure S10.** Digital images showing the specificity of guanosine and inosine among different nucleosides towards the formation of hydrogel upon interaction with  $Zn^{2+}$ .

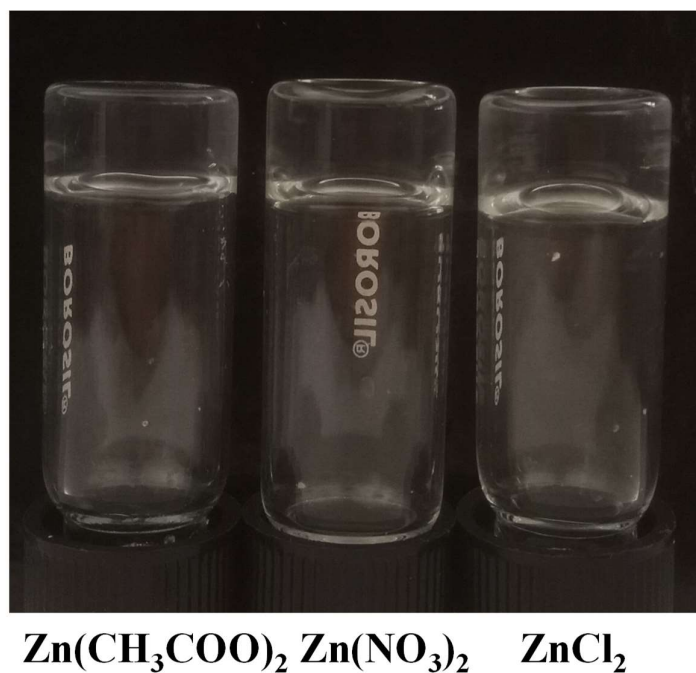

**Figure S11.** Digital images showing the formation of stable gels upon changing of metal counterions viz.  $Zn(CH_3COO)_2$ ,  $Zn(NO_3)_2$  and  $ZnCl_2$  respectively.

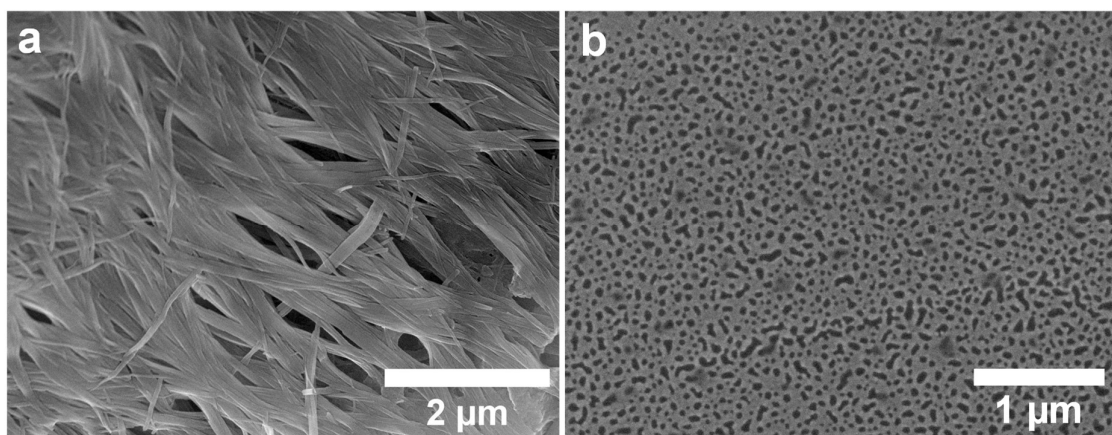

**Figure S12.** FESEM image showing the formation of fibers upon changing of metal counterion to (a) Zinc Nitrate and (b) Zinc Chloride.

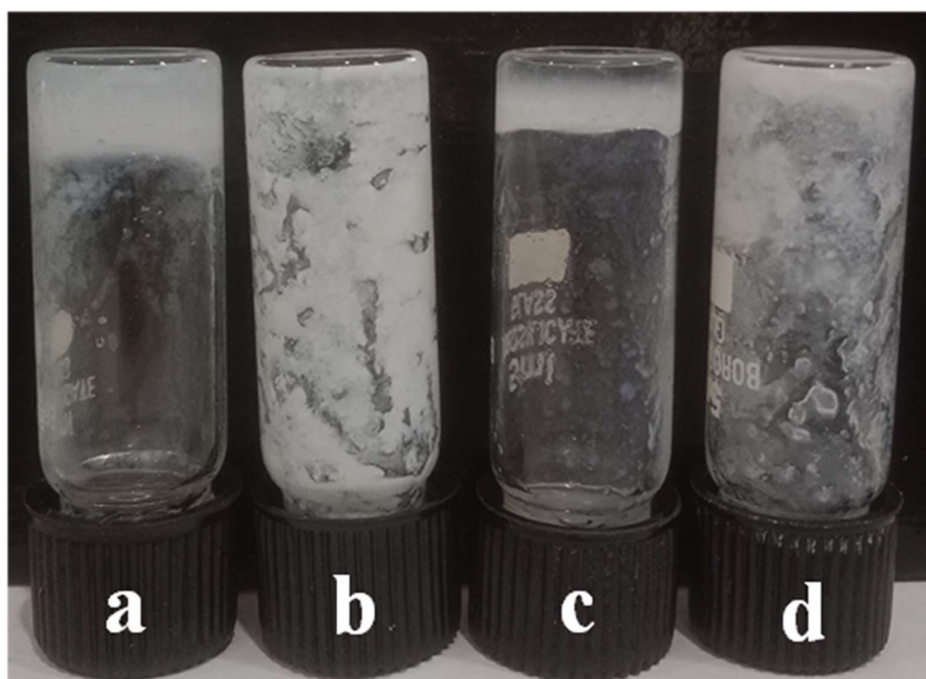

**Figure S13.** Digital images of Zn-Inosine mixtures in different solvents (a) methanol-water (gel) (b) methanol-methanol (precipitate) (c) ethanol-water (gel) and (d) ethanol-ethanol (precipitate) respectively.



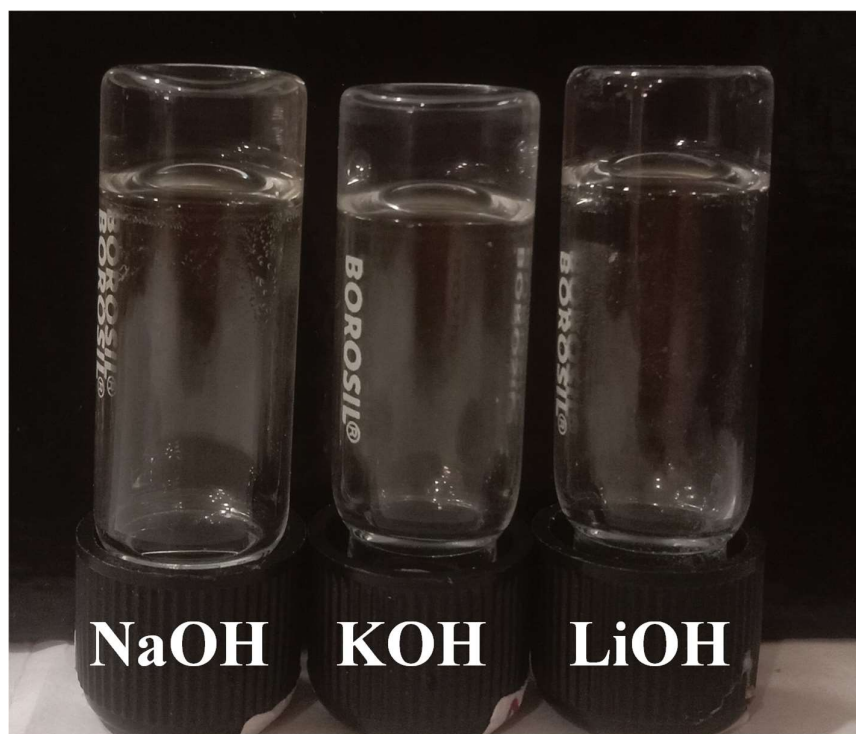

**Figure S14.** Digital images showing the formation of stable gels upon changing bases viz. NaOH, KOH and LiOH respectively, implying that gel formation is not specific to any particular base.

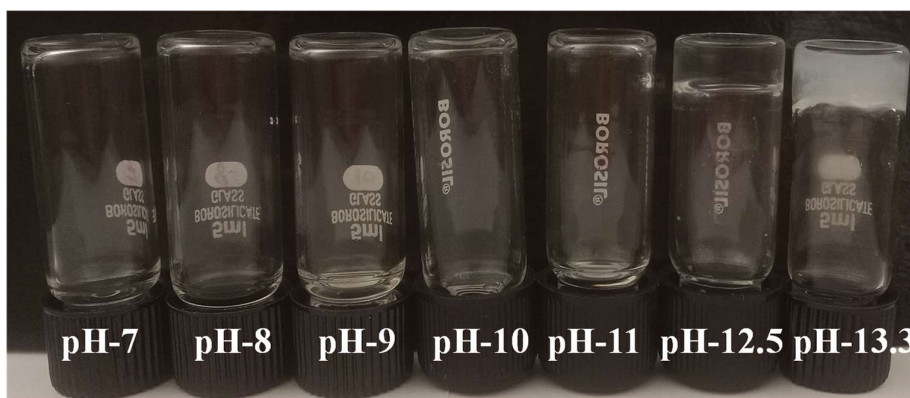

**Figure S15.** Digital images showing the interaction of zinc ions with inosine at different pH (from 7 to 13.3).

**Table S2.** pH measurement of inosine solution after addition of varying concentrations of NaOH and fixed volume of 0.1 M  $\text{Zn}(\text{CH}_3\text{COO})_2 \cdot 2\text{H}_2\text{O}$ .

| Sample ID | Quantity of Inosine (mg) | Volume of water taken (mL) | Volume of added NaOH (1M) (mL) | Measured pH | Volume of $\text{Zn}(\text{CH}_3\text{COO})_2$ (0.1M) added (mL) | Final pH after addition of $\text{Zn}(\text{CH}_3\text{COO})_2$ | Result          |
|-----------|--------------------------|----------------------------|--------------------------------|-------------|------------------------------------------------------------------|-----------------------------------------------------------------|-----------------|
| L1        | 134                      | 4.0                        | 1.0                            | 12.55       | 5                                                                | 7.0                                                             | Transparent Gel |
| L2        | 134                      | 3.5                        | 1.5                            | 13.0        | 5                                                                | 10.1                                                            | Turbid Gel      |

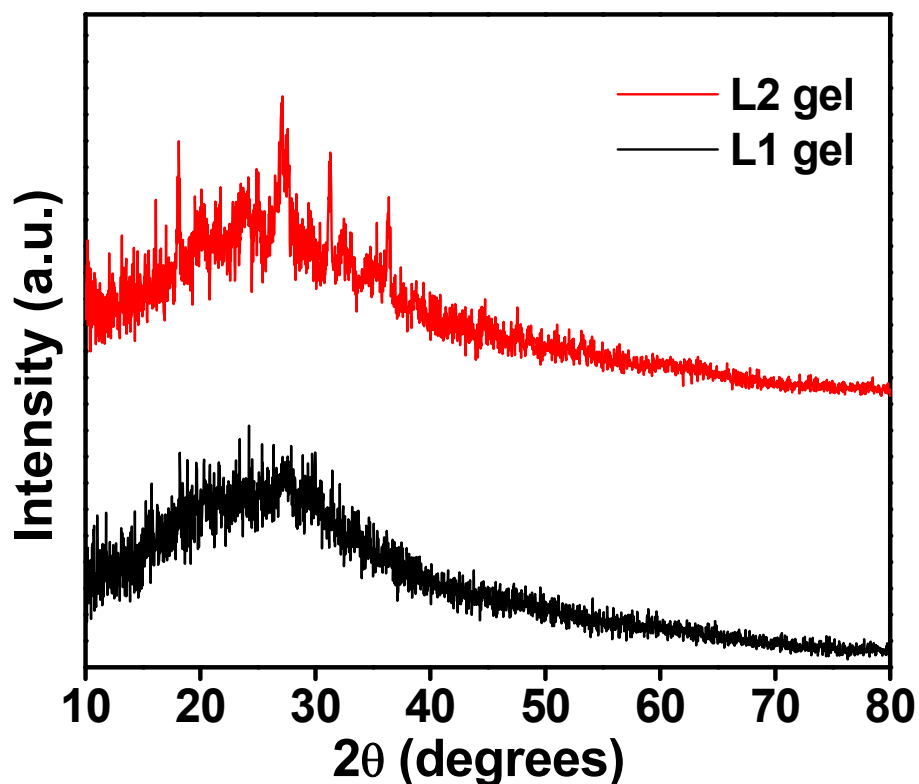

**Figure S16.** PXRD pattern of freeze dried xerogel prepared using inosine solution with a pH of 12.5 (L1) showing an amorphous nature of the gel and inosine with a pH of 13.0 (L2) showing some crystalline peaks.

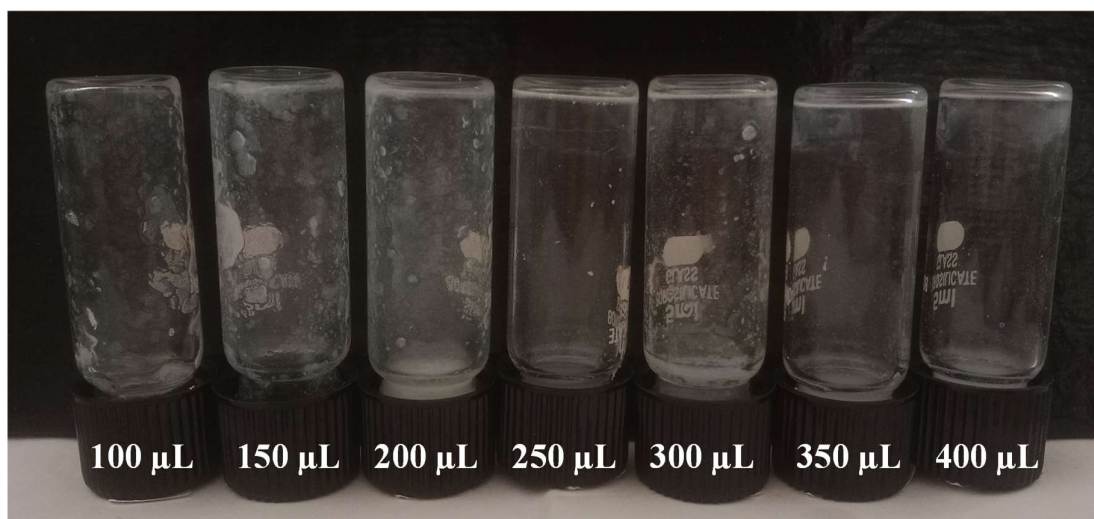

**Figure S17.** Digital images showing the interaction of  $Zn^{2+}$  ions using different concentrations of NaOH without the use of inosine leading to the formation of turbid sol.

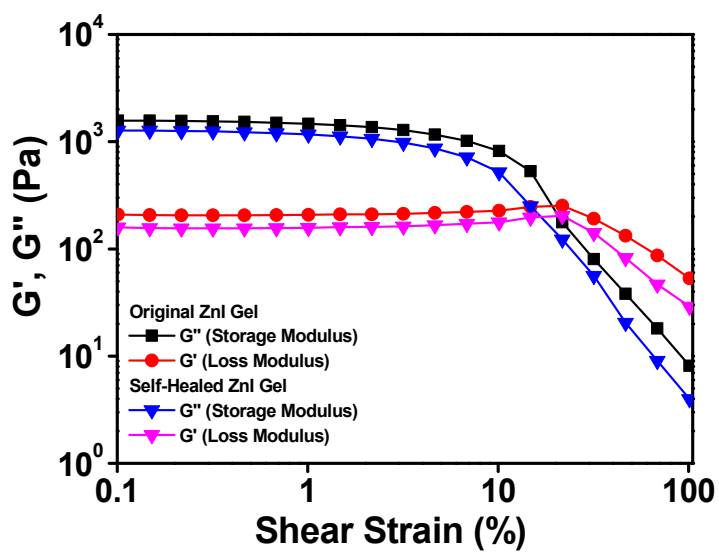

**Figure S18.** (a) Dynamic strain sweep rheological investigation of the original and self-healed Zn-inosine gel.

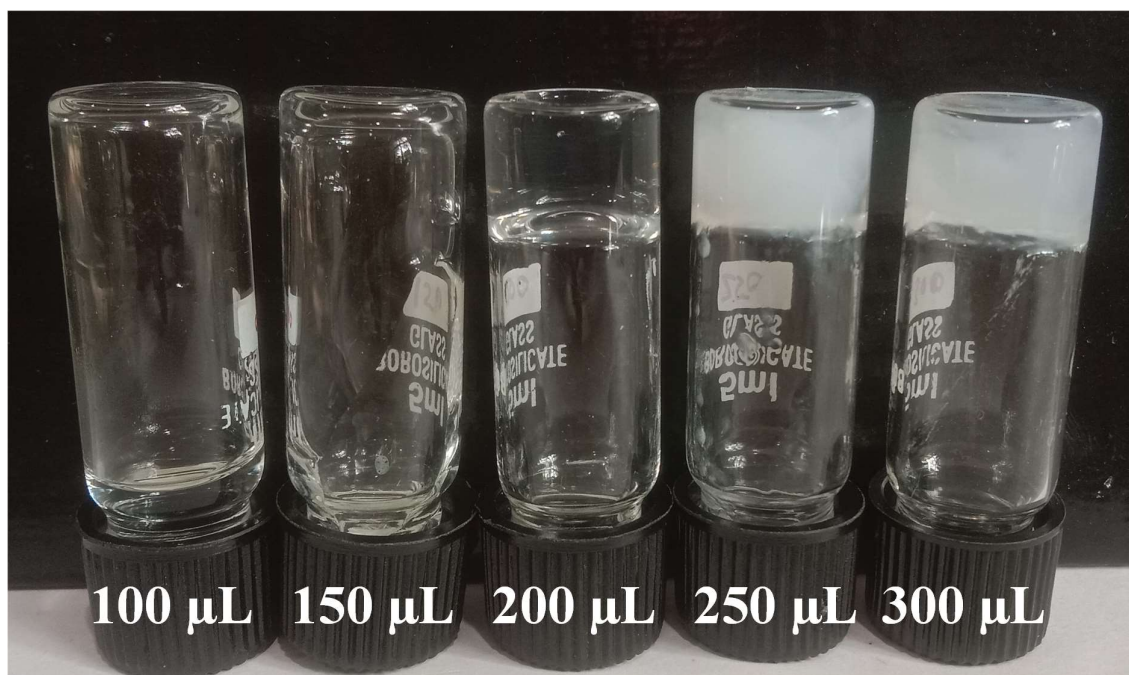

**Figure S19.** Digital images showing the stability of zn-inosine metallogel at different NaOH Concentrations from 100  $\mu\text{L}/\text{ml}$  to 300  $\mu\text{L}/\text{ml}$ .

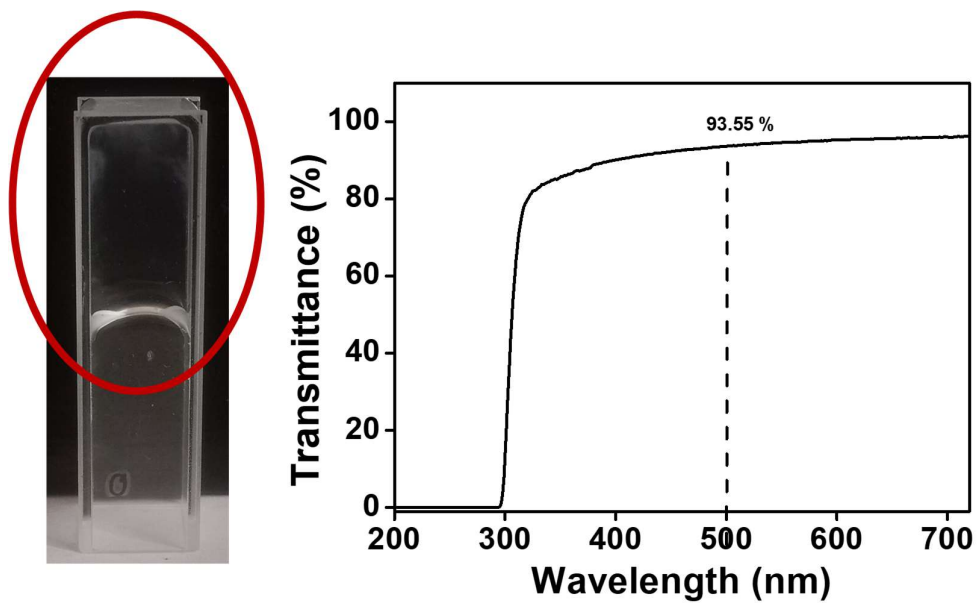

**Figure S20.** Digital image and transmittance spectra of transparent Zn:Inosine metallogel.

## Optical Characterization

The optical band gap of the Zn-I xerogel was estimated using the well-known Tauc's equation given in equation S1

$$(\alpha h\nu) = A(h\nu - E_g)^n \quad (\text{S1})$$

where the usual notation for  $\alpha$ ,  $E_g$ ,  $h$ , and  $\nu$  is given. Two constants appear in this equation: " $n$ " which is dependent on the electron transition, and " $A$ " which, in the best-case scenario, has a value of 1. For our synthesized metallogel, the calculated direct band gap (Optical) ( $E_g$ ) is 3.8 eV.

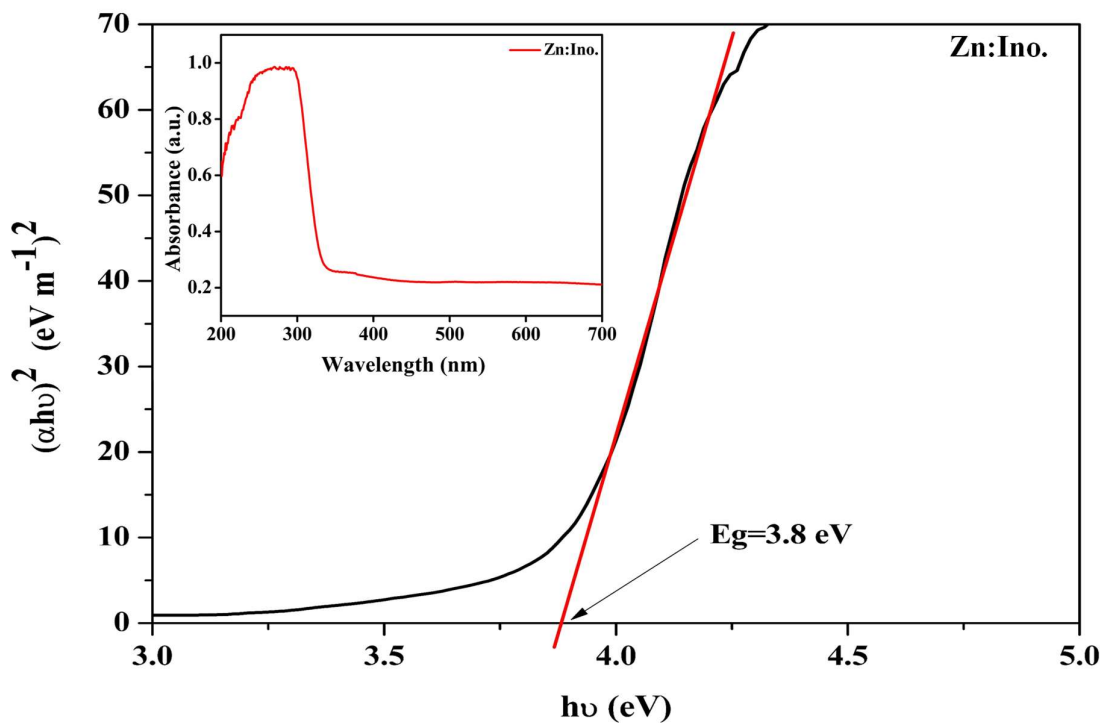

Figure S21. UV-vis absorption spectra (inset) and Tauc's plots for Zinc-Inosine metallogel.

## Device Fabrication and Parameters

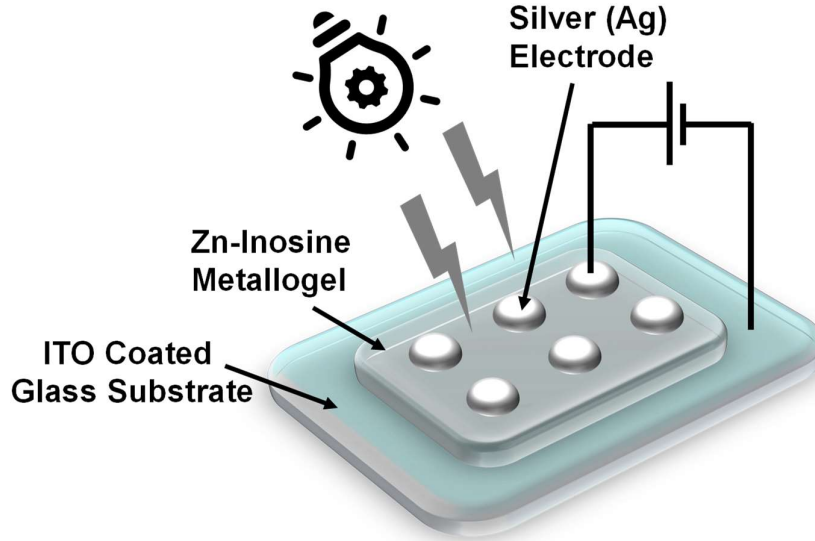

**Scheme S1.** A schematic representation of Schottky diode fabrication using Zn-Inosine metallogel.

Thermionic emission theory has been used to evaluate the  $I-V$  characteristic of the synthesized metallogel based Schottky barrier diode (SBD). Important diode parameters have also been extracted using Cheung's approach. In this sense, the acquired I-V curve has been subjected to a quantitative analysis using the standard equations shown below:

$$I = I_0 \exp\left(\frac{qV}{\eta KT}\right) \left[1 - \exp\left(\frac{-qV}{\eta KT}\right)\right] \quad (\text{S2})$$

$$I_0 = AA^*T^2 \exp\left(\frac{-q\phi_B}{KT}\right) \quad (\text{S3})$$

where  $I_0$ , electronic charge, temperature in Kelvin, Boltzmann constant, forward bias voltage, effective diode area, ideality factor, and effective Richardson constant are, respectively, represented by the symbols  $k$ ,  $T$ ,  $V$ ,  $A$ ,  $\eta$  and  $A^*$ . For the fabricated device an effective Richardson constant of  $32 \text{ AK}^{-2} \text{ cm}^{-2}$  was considered.

Equations S4 to S6, which were taken from Cheung's method, were also used to calculate the series resistance, ideality factor, and barrier potential height.

$$\frac{dV}{d(\ln I)} = \left(\frac{\eta KT}{q}\right) + IR_S \quad (\text{S4})$$

$$H(I) = V - \left(\frac{\eta KT}{q}\right) \ln\left(\frac{I}{AA^*T^2}\right) \quad (\text{S5})$$

$$H(I) = IR_S + \eta\phi_B \quad (\text{S6})$$
